# Supplementary material for: Distinct diurnal temperature rhythm patterns in critical illness myopathy: secondary analysis of two prospective trials
Source: Springer Nature journal article supplement (doi:10.1186/s13613-025-01582-5), 2025-01-01
Supplement: MOESM1 [file 13613_2025_1582_MOESM1_ESM.pdf › 13613_2025_1582_MOESM1_ESM.pdf]

# Distinct circadian temperature rhythm patterns in critical illness myopathy: secondary analysis of two prospective trials

D Mewes<sup>1,2</sup>; S Weber-Carstens<sup>1</sup>; K Rubarth<sup>3</sup>; SD Boie<sup>4</sup>; C Spies<sup>1</sup>; A Kramer<sup>6</sup>; J Fielitz<sup>6,7</sup>; T Wollersheim<sup>1</sup>; B Ananthasubramaniam<sup>8</sup>; F Braune<sup>1</sup>; L Hancke<sup>1</sup>;  
L Spies<sup>4</sup>; F Balzer<sup>4</sup>; LJ Engelhardt<sup>1,9#</sup>

## Additional File 1

|                                                                                                                                                                      |
|----------------------------------------------------------------------------------------------------------------------------------------------------------------------|
| <b>Additional Figures</b>                                                                                                                                            |
| <b>Fig. S1</b> Body temperature rhythms ICU Day 5 and ICU day 10                                                                                                     |
| <b>Fig. S2</b> Wavelet analysis ICU days 1-5 and ICU days 5-10                                                                                                       |
| <b>Fig. S3</b> Comparison of temperature rhythm amplitude in CIM and no-CIM groups using different methods. <b>(a)</b> Cosinor analysis <b>(b)</b> Wavelet analysis. |
| <b>Additional Tables</b>                                                                                                                                             |
| <b>Table S1</b> Multivariable linear regression model for temperature rhythm mesor                                                                                   |
| <b>Table S2</b> Multivariable linear regression model for temperature rhythm amplitude                                                                               |
| <b>Table S3</b> Temperature rhythm parameter variability                                                                                                             |
| <b>Table S4</b> Excluded temperature values                                                                                                                          |
| <b>Table S5</b> Temperature rhythm parameters based on two-component Cosinor analysis                                                                                |
| <b>Table S6</b> Body temperature data preprocessing and software packages                                                                                            |
| <b>Additional References</b>                                                                                                                                         |

## Additional Figures

**a**

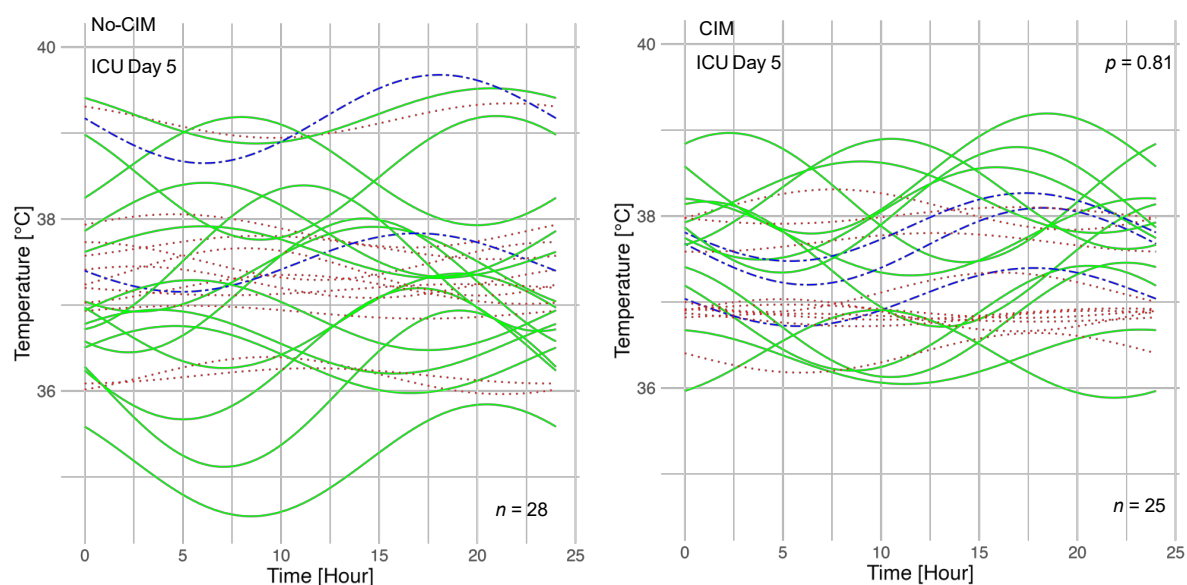

**b**

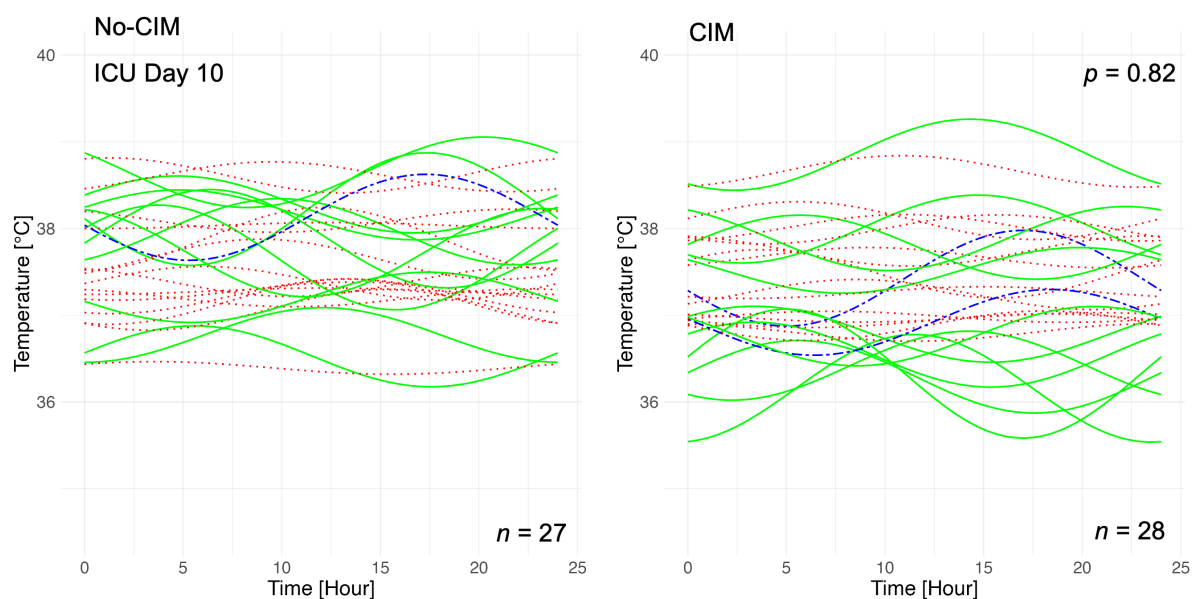

**Fig. S1 Body temperature rhythms (a) ICU day 5 and (b) ICU day 10.** Cosinor analysis in no-CIM and CIM patients, classified relative to the healthy bed rest group by *CompareRhythms*: orange *loss* (amplitude loss), green *change* (phase shift), blue *same* amplitude and phase. In the initial phase of critical illness, both groups showed temperature rhythms with phase-shifts and amplitude loss. Rhythm class distribution in no-CIM vs. CIM groups on ICU day 5 and ICU day 10, Chi-square test. Data were presented at *ESICM Lives 2024*, the Abstract has been published (1).

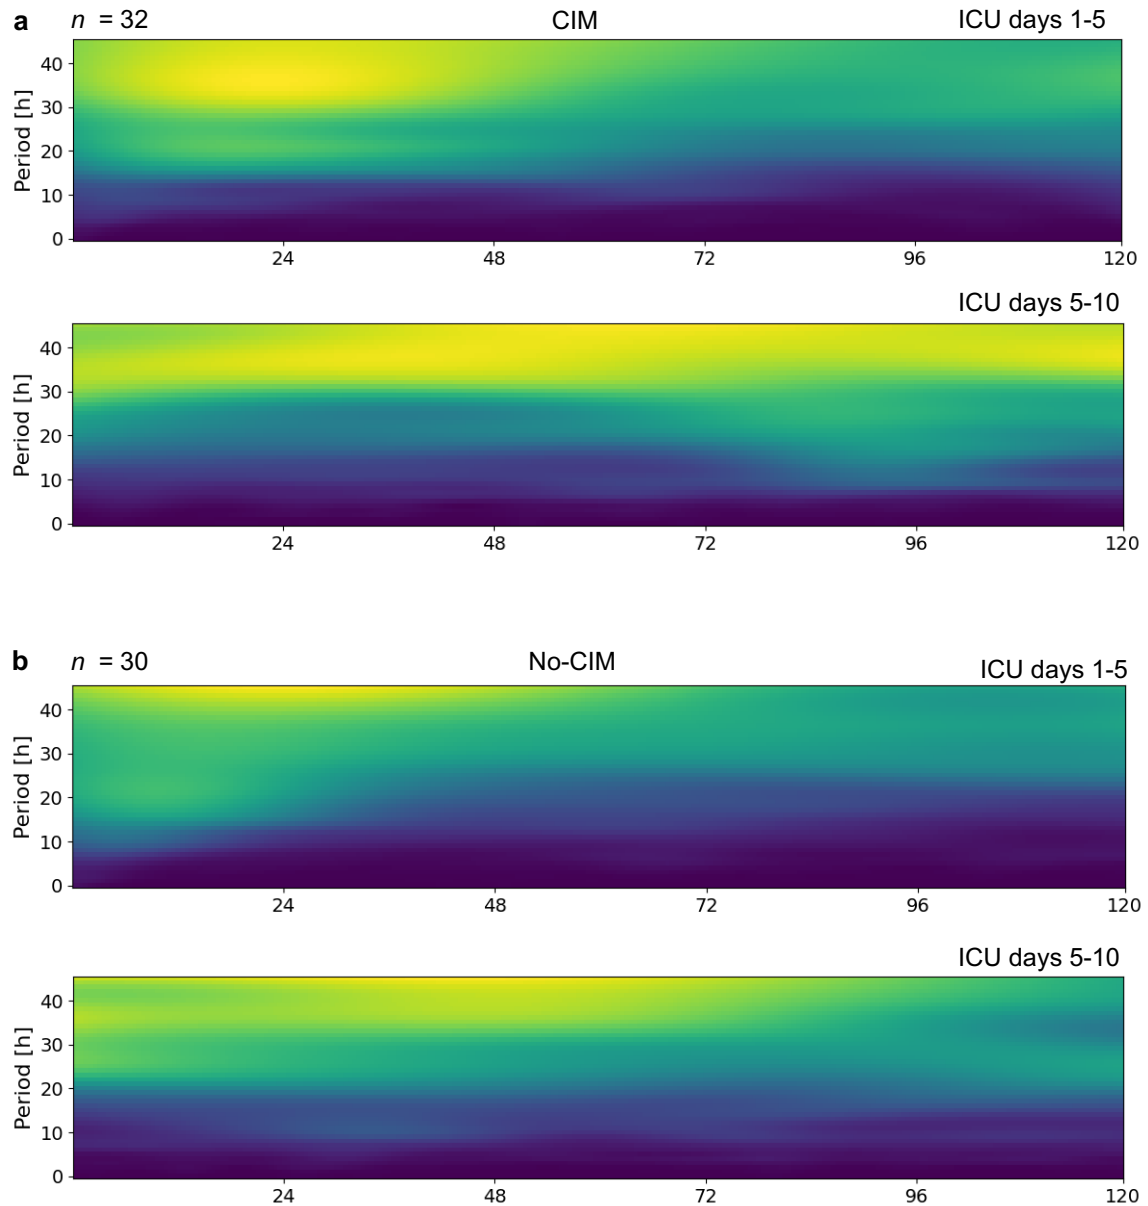

**Fig. S2 Wavelet spectrogram ICU days 1-5 and ICU days 5-10** Bright yellow regions indicate average temperature rhythm periods at the given time point during ICU stay with a high relative power. Temperature rhythm period varies as a function of time in the ICU in both, the CIM and no-CIM groups. Early during ICU stay, the periodic signal appears more diffuse, while over time, a strengthening of the 24-hour period is observed in the wavelet power spectrum in both groups (Fig.7). Visual group-level comparison does not suggest a relevant difference between groups.

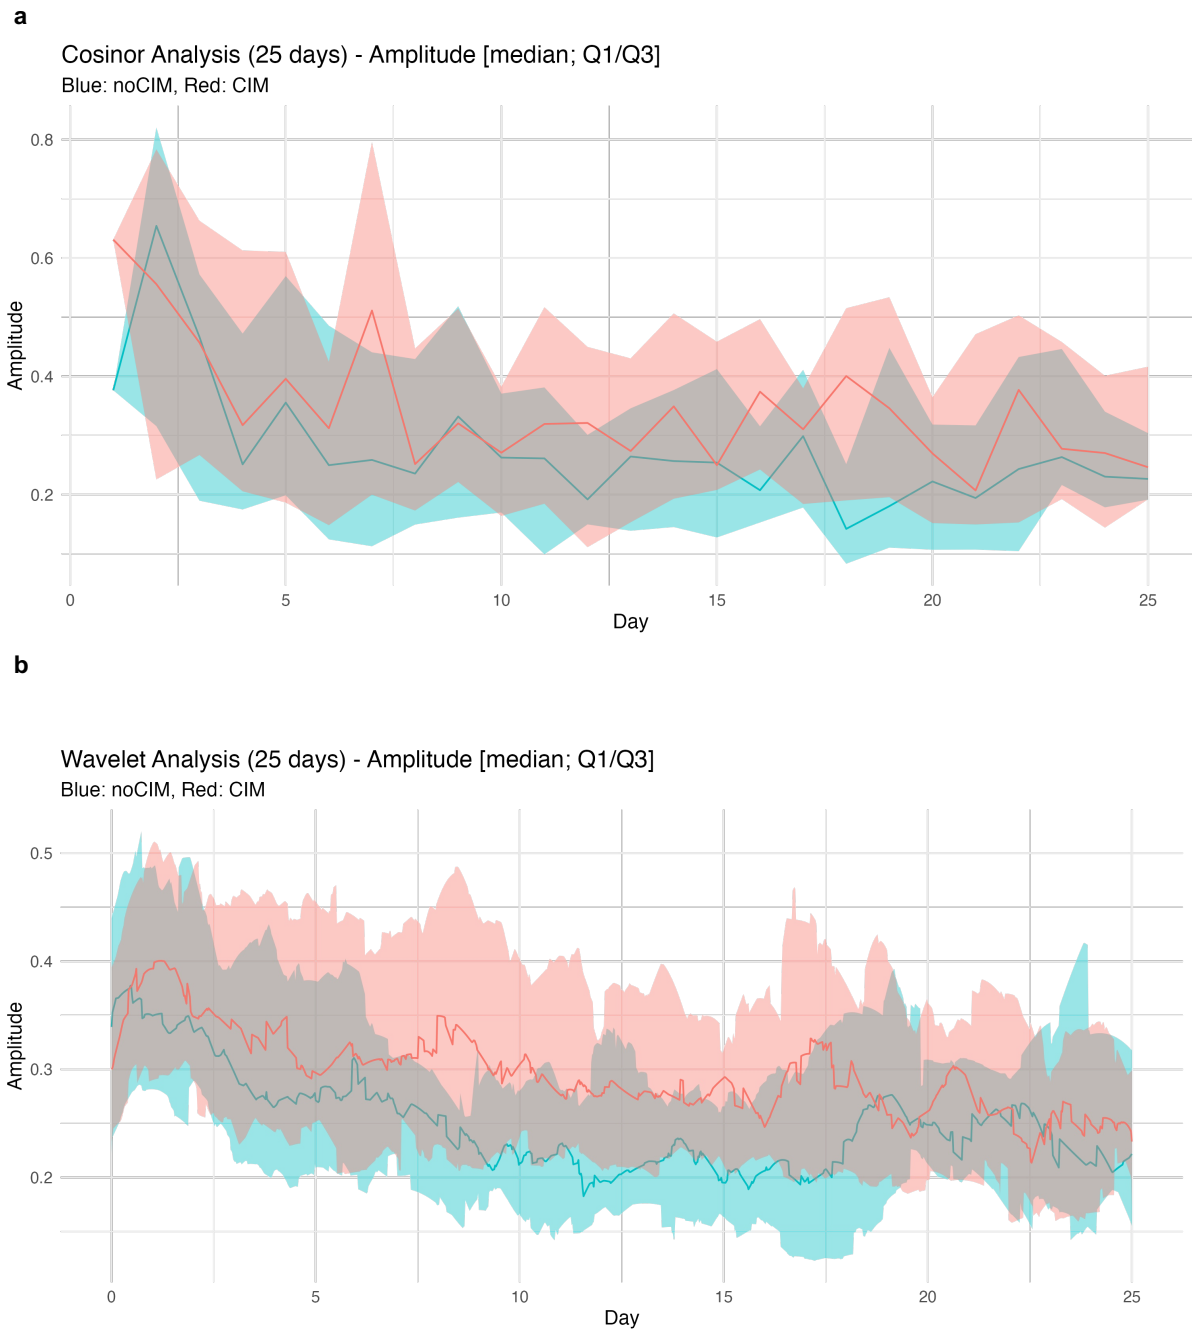

**Fig. S3 Comparison of temperature rhythm amplitude in CIM and no-CIM groups using different analysis methods. (a) Cosinor analysis:** Temperature rhythm amplitude is consistently higher in CIM compared to no-CIM patients on most ICU days between day 1 and 25. **(b) Wavelet analysis:** Temperature rhythm amplitude is likewise consistently higher in CIM compared to no-CIM patients across the majority of ICU days between day 1 and 25.

**Table S1** Multivariable linear regression model for temperature rhythm mesor*n*=62 patients (no-CIM *n*=30, CIM *n*=32)

| Response Variable | Variable  | $\beta$ | 95% CI of $\beta$ | $\beta$ standardized | <i>p</i> | $R^2$ | $R^2$ adjusted | <i>p</i> model |
|-------------------|-----------|---------|-------------------|----------------------|----------|-------|----------------|----------------|
| Mesor             | Intercept | 36.95   | [36.86;37.03]     |                      | <0.01    | 0.48  | 0.47           | <0.01          |
|                   | CIM       | -0.10   | [-0.15; -0.05]    | -0.08                | <0.01    |       |                |                |
|                   | Age       | 0.00    | [0.00/0.00]       | 0.01                 | 0.71     |       |                |                |
|                   | Sex       | 0.05    | [0.00/0.10]       | 0.04                 | 0.06     |       |                |                |
|                   | Fever     | 0.92    | [0.87/0.96]       | 0.68                 | <0.01    |       |                |                |

*B* regression coefficient,  $\beta$  standardized regression coefficient, *CI* Confidence interval, CIM Critical illness myopathy

**Table S2.** Multivariable linear regression model for temperature rhythm amplitude*n*=62 patients (no-CIM *n*=30, CIM *n*=32)

| Response Variable | Variable  | $\beta$ | 95% CI of $\beta$ | $\beta$ standardized | <i>p</i> | $R^2$ | $R^2$ adjusted | <i>p</i> model |
|-------------------|-----------|---------|-------------------|----------------------|----------|-------|----------------|----------------|
| Amplitude         | Intercept | 0.29    | [0.25;0.34]       |                      | <0.01    | 0.09  | 0.08           | <0.01          |
|                   | CIM       | 0.07    | [0.04;0.1]        | 0.13                 | <0.01    |       |                |                |
|                   | Age       | -0.001  | [-0.002/0.00]     | -0.06                | 0.02     |       |                |                |
|                   | Sex       | -0.02   | [-0.05; 0.01]     | -0.04                | 0.11     |       |                |                |
|                   | Fever     | 0.14    | [0.11;0.16]       | 0.26                 | <0.01    |       |                |                |

*B* regression coefficient,  $\beta$  standardized regression coefficient, *CI* Confidence interval, CIM Critical illness myopathy

**Table S3** Interindividual temperature rhythm variability

| Rhythm parameter          | ICU Days | CIM          | No-CIM       | <i>p</i> -value |
|---------------------------|----------|--------------|--------------|-----------------|
| Amplitude variability     | 1-5      | 0.44 [0.26]  | 0.44 [0.33]  | 0.515           |
| Mesor variability         | 1-5      | 37.25 [0.90] | 37.13 [1.06] | 0.735           |
| Time of nadir variability | 1-5      | 11.41 [5.87] | 12.92 [6.14] | 0.765           |
| Amplitude variability     | 6-10     | 0.33 [0.22]  | 0.29 [0.27]  | 0.191           |
| Mesor variability         | 6-10     | 37.29 [0.68] | 37.42 [1.13] | 0.617           |
| Time of nadir variability | 6-10     | 10.98 [5.86] | 9.80 [3.64]  | 0.788           |
| Amplitude variability     | Last 5   | 0.30 [0.28]  | 0.21 [0.10]  | 0.002           |
| Mesor variability         | Last 5   | 37.23 [0.80] | 37.26 [0.31] | 0.118           |
| Time of nadir variability | Last 5   | 9.56 [7.35]  | 8.89 [8.19]  | 0.902           |

*Results in Median [IQR]; last ICU days refers to last days with available temperature data  
Brown-Forsythe Test;*

**Table S4. Excluded temperature values basic statistics**

|                                                                                                     | CIM                               | No-CIM                            |
|-----------------------------------------------------------------------------------------------------|-----------------------------------|-----------------------------------|
| Patients ( <i>n</i> )                                                                               | 32                                | 30                                |
| Overall temperature values per group ( <i>n</i> )                                                   | 50553                             | 41005                             |
| Excluded temperature values <34°C<br>( <i>n</i> and % of overall temperature values)                | 515 (1.0%)<br>mean value: 30.9 °C | 270 (0.7%)<br>mean value: 30.1 °C |
| Excluded temperature values >41°C<br>( <i>n</i> and % of overall temperature values,<br>mean value) | 4 (0.01%)<br>mean: 41.5 °C        | 6 (0.01%)<br>mean: 41.4 °C        |
| Temperature values outliers excluded ( <i>n</i><br>and %))                                          | 50034 (99.0%)                     | 40729 (99.3%)                     |
| Overall ICU days per group* ( <i>n</i> )                                                            | 1226                              | 938                               |
| Excluded ICU days with data gaps >4h<br>( <i>n</i> and % of overall ICU days)                       | 325 (26.5%)                       | 210 (22.3%)                       |
| Overall days included in Cosinor Analysis<br>per group<br>( <i>n</i> and % of overall ICU days)     | 901 (73.5%)                       | 728 (77.7%)                       |

\* measurement outlier removal reduced both CIM and No-CIM by two days, as these consisted entirely of outlying values.

**Table S5. Temperature rhythm parameters based on two-component Cosinor analysis**

| Rhythm parameter                    | CIM                 | No-CIM              | p-value |
|-------------------------------------|---------------------|---------------------|---------|
| R <sup>2</sup>                      | 0.74 [0.68, 0.79]   | 0.71 [0.65, 0.77]   | 0.25    |
| Amplitude (in °C)                   | 0.42 [0.36, 0.48]   | 0.33 [0.26, 0.41]   | 0.02    |
| Mesor (in °C)                       | 37.24 [37.09, 37.4] | 37.41 [37.18, 37.7] | 0.07    |
| Time of temperature nadir 1 (hh:mm) | 7.21 [6.28, 8.35]   | 7.89 [6.91, 11.18]  | 0.15    |
| Time of temperature nadir 2 (hh:mm) | 17.18 [15.3, 18.59] | 17 [15.84, 19.14]   | 0.67    |
| Missing second component (%)        | 0.54 [0.47, 0.63]   | 0.58 [0.5, 0.65]    |         |

*Brunner Munzel Test*; The two-component Cosinor analysis improved model fit (R<sup>2</sup>), as expected. However, a second peak was not consistently detectable (58% of no-CIM and 54% of CIM patients showed no second peak). Importantly, the central finding of a higher amplitude in CIM remained unchanged in the two-harmonic Cosinor model.

**Table S6. Body temperature data preprocessing and software packages**

|                                     |                                                                                                                                                                                                                                                                                                                                                                                                                                                                                                                                                                                                                                                                                                                                                                                                                                                                                                                                                                                                                                                                                                                                                                                                                                                                                                                                                       |
|-------------------------------------|-------------------------------------------------------------------------------------------------------------------------------------------------------------------------------------------------------------------------------------------------------------------------------------------------------------------------------------------------------------------------------------------------------------------------------------------------------------------------------------------------------------------------------------------------------------------------------------------------------------------------------------------------------------------------------------------------------------------------------------------------------------------------------------------------------------------------------------------------------------------------------------------------------------------------------------------------------------------------------------------------------------------------------------------------------------------------------------------------------------------------------------------------------------------------------------------------------------------------------------------------------------------------------------------------------------------------------------------------------|
| <b>Filtering and pre-processing</b> | <ul style="list-style-type: none"> <li>Individual measurements below 34 °C were removed since the data below the physiological range were frequently single outliers (details see Table S5)</li> <li>Days with time gaps in body temperature ≥ 4 hours were excluded (details see Table S5)</li> <li>For the healthy bed rest group, 24-hour rectal temperature data after one week of bed rest were resampled to 60-minute intervals for the complete day of measurements using the <i>round_date</i> function of the <i>lubridate</i> package for R (2).</li> <li>The ICU patients temperature measurements were resampled to 60-minute intervals before performing rhythm classification. The <i>compareRhythms</i> package requires regular data points. We decided to perform hourly resampling (60 minutes), as a compromise between preserving clinically meaningful temperature fluctuations and allowing the use of days with fewer measurements. This was performed using the <i>round_date</i> function of the <i>lubridate</i> package for R (2), reducing the temporal resolution by taking the mean of all measurements within each hour.</li> <li>The cut-off value used for the distinction between <i>loss</i> and <i>change</i> categories in the <i>compareRhythms</i> classification was based on the healthy bed rest</li> </ul> |
|-------------------------------------|-------------------------------------------------------------------------------------------------------------------------------------------------------------------------------------------------------------------------------------------------------------------------------------------------------------------------------------------------------------------------------------------------------------------------------------------------------------------------------------------------------------------------------------------------------------------------------------------------------------------------------------------------------------------------------------------------------------------------------------------------------------------------------------------------------------------------------------------------------------------------------------------------------------------------------------------------------------------------------------------------------------------------------------------------------------------------------------------------------------------------------------------------------------------------------------------------------------------------------------------------------------------------------------------------------------------------------------------------------|

|                                                                 |                                                                                                                                                                                                                                                                                                                                                                                                                                                                                                                                                                                                                                                                                                                                                                                                |
|-----------------------------------------------------------------|------------------------------------------------------------------------------------------------------------------------------------------------------------------------------------------------------------------------------------------------------------------------------------------------------------------------------------------------------------------------------------------------------------------------------------------------------------------------------------------------------------------------------------------------------------------------------------------------------------------------------------------------------------------------------------------------------------------------------------------------------------------------------------------------|
|                                                                 | group, as described in the Methods (main manuscript).                                                                                                                                                                                                                                                                                                                                                                                                                                                                                                                                                                                                                                                                                                                                          |
| <b>Software for data importing, pre-processing and analysis</b> | <ul style="list-style-type: none"> <li>▪ Importing, cleaning, and analysis of data have been implemented using RStudio (version 2023.12.0+369) and R (version 4.3.2 (2023-10-31) (3), Python (v.3.11.3) and SciPy (v.1.11.4).</li> <li>▪ The CosinorPy library (v2.1) for cosinor analysis (4), reticulate package was used to execute Python code within R markdown notebooks.</li> <li>▪ Rhythm classification was determined for ICU day 5, ICU day 10, and the day before ICU discharge using the <i>compareRhythms</i> R library (5).</li> <li>▪ Further R packages: broom (6), , flextable (7), ggbeeswarm(8), ggpubr(9), ggstatsplot (10), knitr (11), lubridate(12), nparcomp (13), nparLD (13), patchwork(14), reticulate (15), rmarkdown (16), table1 (17), tidyverse(18)</li> </ul> |



## References

1. Engelhardt LJ, Mewes D, Spies C, Wollersheim T, Kramer A, Ananthasubramaniam B, Balzer F, Rubarth K, Boie S, Weber-Carstens S: Circadian Temperature Rhythms and the Development of Critical Illness Myopathy (Best Abstracts). *Intensive Care Medicine Experimental* 2024; 12:87
2. Mendt S, Gunga H-C, Felsenberg D, et al.: Regular exercise counteracts circadian shifts in core body temperature during long-duration bed rest [Internet]. *npj Microgravity* 2021; 7:1–6[cited 2023 Apr 21] Available from: <https://www.nature.com/articles/s41526-020-00129-1>
3. R Core Team: R: a language and environment for statistical computing [Internet]. Vienna, Austria: R Foundation for Statistical Computing; 2023. Available from: <https://www.R-project.org/>
4. Moškon M: CosinorPy: a python package for cosinor-based rhythmometry. *BMC Bioinformatics* 2020; 21:485
5. Pelikan A, Herzel H, Kramer A, et al.: Venn diagram analysis overestimates the extent of circadian rhythm reprogramming. *FEBS J* 2021;
6. Robinson D, Hayes A, Couch S: broom: Convert statistical objects into tidy tibbles [Internet]. 2023. Available from: <https://CRAN.R-project.org/package=broom>
7. Gohel D, Skintzos P: flextable: Functions for tabular reporting [Internet]. 2024. Available from: <https://CRAN.R-project.org/package=flextable>
8. Clarke E, Sherrill-Mix S, Dawson C: ggbeeswarm: Categorical scatter (violin point) plots [Internet]. 2023. Available from: <https://github.com/eclarke/ggbeeswarm>
9. Kassambara A: ggpubr: “ggplot2” based publication ready plots [Internet]. 2023. Available from: <https://rpkgs.datanovia.com/ggpubr/>
10. Patil I: Visualizations with statistical details: The “ggstatsplot” approach [Internet]. *Journal of Open Source Software* 2021; 6:3167 Available from: <https://doi.org/10.21105/joss.03167>
11. Xie Y: knitr: a comprehensive tool for reproducible research in R. In: Stodden V, Leisch F, Peng RD, editor(s). Implementing reproducible computational research. Chapman and Hall/CRC; 2014.
12. Grolemund G, Wickham H: Dates and times made easy with lubridate [Internet]. *Journal of Statistical Software* 2011; 40:1–25 Available from: <https://www.jstatsoft.org/v40/i03/>
13. Konietzschke F, Placzek M, Schaarschmidt F, et al.: nparcomp: An R software package for nonparametric multiple comparisons and simultaneous confidence

- intervals [Internet]. *Journal of Statistical Software* 2015; 64:1–17 Available from: <http://www.jstatsoft.org/v64/i09/>
14. Pedersen TL: patchwork: The composer of plots [Internet]. 2023. Available from: <https://CRAN.R-project.org/package=patchwork>
  15. Ushey K, Allaire J, Tang Y: reticulate: Interface to “Python” [Internet]. 2023. Available from: <https://CRAN.R-project.org/package=reticulate>
  16. Xie Y, Dervieux C, Riederer E: R markdown cookbook [Internet]. Boca Raton, Florida: Chapman and Hall/CRC; 2020. Available from: <https://bookdown.org/yihui/rmarkdown-cookbook>
  17. Rich B: table1: Tables of descriptive statistics in HTML [Internet]. 2023. Available from: <https://CRAN.R-project.org/package=table1>
  18. Wickham H, Averick M, Bryan J, et al.: Welcome to the tidyverse. *Journal of Open Source Software* 2019; 4:1686
